# Supplementary material for: Factors Associated with Cardiac/Pericardial Injury among Blunt Injury Patients: A Nationwide Study in Japan
Source: MDPI journal article supplement (doi:10.3390/jcm11154534), 2022-08-03
Supplement: s1 [file s1]

**Table S1.** Abbreviated Injury Scale (AIS) code for cardiac/pericardial injury.

| <b>Injury Site</b> | <b>AIS Code</b> | <b>Description of Injury</b>                                                                                                              |
|--------------------|-----------------|-------------------------------------------------------------------------------------------------------------------------------------------|
| Heart              | 441099.1        | Heart (Myocardium), NFS                                                                                                                   |
|                    | 441002.1        | Contusion (hematoma), NFS                                                                                                                 |
|                    | 441004.1        | Contusion, minor, patients presenting with dysrhythmia, wall motion abnormality, other ECG changes not related to coronary artery disease |
|                    | 441006.4        | Contusion, major, this diagnosis must be substantiated, e.g., by surgery, autopsy, ejection fraction <25% absent coronary artery disease  |
|                    | 441008.3        | Laceration, NFS                                                                                                                           |
|                    | 441010.3        | Laceration, no perforation, no chamber involvement                                                                                        |
|                    | 441012.5        | Laceration, perforation (ventricular or atrial with or without tamponade)                                                                 |
|                    | 441014.6        | Laceration, perforation, complex or ventricular rupture                                                                                   |
|                    | 441016.6        | Laceration, perforation, multiple lacerations; >50% tissue loss of a chamber                                                              |
|                    | 441018.6        | Avulsion                                                                                                                                  |
|                    | 441200.5        | Intracardiac valve laceration (rupture)                                                                                                   |
|                    | 441300.5        | Intraventricular or interatrial septum laceration (rupture)                                                                               |
| Pericardium        | 441699.2        | Pericardium, NFS                                                                                                                          |
|                    | 441602.2        | Laceration (rupture)                                                                                                                      |
|                    | 441604.3        | Injury with tamponade without heart injury                                                                                                |
|                    | 441606.5        | Herniation of heart                                                                                                                       |

AIS—Abbreviated Injury Scale; ECG—echocardiogram; NFS—not further specified.

**Table S2.** AIS code for concomitant thoracic injury.

| <b>Thoracic Aortic Injury</b> | <b>Tracheal Injury</b> | <b>Esophageal Injury</b> | <b>Pulmonary Contusion</b> | <b>Rib Fracture</b> | <b>Sternal Fracture</b>              | <b>Clavicle Fracture</b> | <b>Hemothorax / Pneumothorax</b> | <b>Thoracic Spinal Injury</b> |
|-------------------------------|------------------------|--------------------------|----------------------------|---------------------|--------------------------------------|--------------------------|----------------------------------|-------------------------------|
| 420202.4                      | 442602.3               | 440802.2                 | 441402.3                   | 450210.2            | 450804.2<br>450802.1                 | 752200.2                 | Thoracic aorta                   | 630402.2                      |
| 420204.5                      | 442604.3               | 440804.3                 | 441406.3                   | 450211.3            | Sternum,<br>contusion<br>(exclusion) |                          | 420218.6                         | 630404.2                      |

[illegible]

| Thoracic Aortic Injury | Tracheal Injury | Esophageal Injury | Pulmonary Contusion | Rib Fracture | Sternal Fracture | Clavicle Fracture | Hemothorax / Pneumothorax | Thoracic Spinal Injury |
|------------------------|-----------------|-------------------|---------------------|--------------|------------------|-------------------|---------------------------|------------------------|
|                        |                 |                   |                     |              |                  |                   |                           | 640450.5               |
|                        |                 |                   |                     |              |                  |                   |                           | 640460.5               |
|                        |                 |                   |                     |              |                  |                   |                           | 640462.5               |
|                        |                 |                   |                     |              |                  |                   |                           | 640464.5               |
|                        |                 |                   |                     |              |                  |                   |                           | 640466.5               |
|                        |                 |                   |                     |              |                  |                   |                           | 640468.5               |
|                        |                 |                   |                     |              |                  |                   |                           | 640478.1               |
|                        |                 |                   |                     |              |                  |                   |                           | 640484.1               |
|                        |                 |                   |                     |              |                  |                   |                           | 650400.2               |
|                        |                 |                   |                     |              |                  |                   |                           | 650402.2               |
|                        |                 |                   |                     |              |                  |                   |                           | 650403.3               |
|                        |                 |                   |                     |              |                  |                   |                           | 650404.2               |
|                        |                 |                   |                     |              |                  |                   |                           | 650409.2               |
|                        |                 |                   |                     |              |                  |                   |                           | 650410.2               |
|                        |                 |                   |                     |              |                  |                   |                           | 650412.3               |
|                        |                 |                   |                     |              |                  |                   |                           | 650416.2               |
|                        |                 |                   |                     |              |                  |                   |                           | 650418.2               |
|                        |                 |                   |                     |              |                  |                   |                           | 650420.2               |
|                        |                 |                   |                     |              |                  |                   |                           | 650422.3               |
|                        |                 |                   |                     |              |                  |                   |                           | 650424.3               |
|                        |                 |                   |                     |              |                  |                   |                           | 650426.3               |
|                        |                 |                   |                     |              |                  |                   |                           | 650430.2               |
|                        |                 |                   |                     |              |                  |                   |                           | 650432.2               |
|                        |                 |                   |                     |              |                  |                   |                           | 650434.3               |
|                        |                 |                   |                     |              |                  |                   |                           | 650499.2               |

AIS—Abbreviated Injury Scale; NFS—not further specified.
